# Supplementary material for: Hyperthermic Intraperitoneal Chemotherapy (HIPEC): New Approaches and Controversies on the Treatment of Advanced Epithelial Ovarian Cancer—Systematic Review and Meta-Analysis
Source: MDPI journal article supplement (doi:10.3390/jcm12227012), 2023-11-09
Supplement: s1 [file s1]

**Table S1. Quality scores of the case-control studies included in the meta-analysis, assessed by the Newcastle-Ottawa scale.**

Newcastle-Ottawa scale for assessment of quality of included studies - Case-control studies (each asterisk represents if individual criterion within the subsection was fulfilled).

|                      |      | Selection       |                                 |                       |                        | Comparability                         |                                    | Exposure                  |                                    |                   |                 |
|----------------------|------|-----------------|---------------------------------|-----------------------|------------------------|---------------------------------------|------------------------------------|---------------------------|------------------------------------|-------------------|-----------------|
| Author               | Year | Case definition | Representativeness of the cases | Selection of Controls | Definition of Controls | Control for the most important factor | Control for any additional factors | Ascertainment of exposure | Same method for cases and controls | Non-Response Rate | Overall quality |
| Ceresoli [29]        | 2018 | *               | *                               | 0                     | 0                      | *                                     | *                                  | *                         | *                                  | *                 | 7               |
| He [25]              | 2021 | *               | *                               | *                     | *                      | *                                     | *                                  | *                         | *                                  | 0                 | 8               |
| Lei [34]             | 2020 | *               | *                               | 0                     | *                      | *                                     | *                                  | *                         | *                                  | 0                 | 7               |
| Lim [27]             | 2022 | *               | *                               | *                     | *                      | *                                     | *                                  | *                         | *                                  | 0                 | 8               |
| Marrelli [31]        | 2021 | *               | *                               | 0                     | 0                      | *                                     | *                                  | *                         | *                                  | *                 | 7               |
| Mendivil [18]        | 2017 | *               | *                               | *                     | *                      | *                                     | *                                  | *                         | *                                  | 0                 | 8               |
| Van Driel [12]       | 2018 | *               | *                               | *                     | *                      | *                                     | *                                  | *                         | *                                  | 0                 | 8               |
| Wu [30]              | 2022 | *               | *                               | *                     | *                      | *                                     | *                                  | *                         | *                                  | 0                 | 8               |
| Ghirardi [22]        | 2022 | *               | *                               | *                     | 0                      | *                                     | *                                  | *                         | *                                  | 0                 | 7               |
| Cascales Campos [20] | 2014 | *               | *                               | 0                     | 0                      | *                                     | *                                  | *                         | *                                  | *                 | 7               |
| Cascales Campos [21] | 2015 | *               | *                               | 0                     | 0                      | *                                     | *                                  | *                         | *                                  | *                 | 7               |
| Zivanovic [19]       | 2021 | *               | *                               | *                     | *                      | *                                     | *                                  | *                         | *                                  | *                 | 9               |
| Safra [23]           | 2014 | *               | *                               | 0                     | *                      | *                                     | *                                  | *                         | *                                  | 0                 | 7               |
| Fagotti [26]         | 2012 | *               | *                               | *                     | *                      | *                                     | *                                  | *                         | *                                  | 0                 | 8               |
| Baiocchi [33]        | 2015 | *               | *                               | *                     | *                      | *                                     | *                                  | 0                         | *                                  | *                 | 8               |
| Munoz-Casares [32]   | 2009 | *               | *                               | *                     | 0                      | *                                     | *                                  | 0                         | *                                  | *                 | 6               |
| Biacchi [24]         | 2019 | *               | *                               | 0                     | *                      | *                                     | *                                  | *                         | *                                  | *                 | 8               |

**Table S2: Quality Assessment for RCTs\* (Method: Cochrane Collaboration's Tool for Assessing Risk of Bias)**

|                | Selection bias             |                        | Performance bias                      | Detection bias                 | Attrition bias          | Reporting bias      | Other bias                          | Total               |
|----------------|----------------------------|------------------------|---------------------------------------|--------------------------------|-------------------------|---------------------|-------------------------------------|---------------------|
| Author         | Random sequence generation | Allocation concealment | Blinding of participant and personnel | Blinding of outcome assessment | Incomplete outcome data | Selective reporting | Anything else, ideally prespecified | Low on risk of bias |
| Spiliotis [14] | Low                        | Low                    | Low                                   | Low                            | Low                     | Unclear             | Low                                 | 7-Jun               |

RCTs\*=randomized controlled trials
